# Supplementary material
Source: PubMed Central journal article supplement (PMC11028360)
Supplement: 262_2018_2228_MOESM1_ESM.pdf [file 262_2018_2228_MOESM1_ESM.pdf]

**CD4**

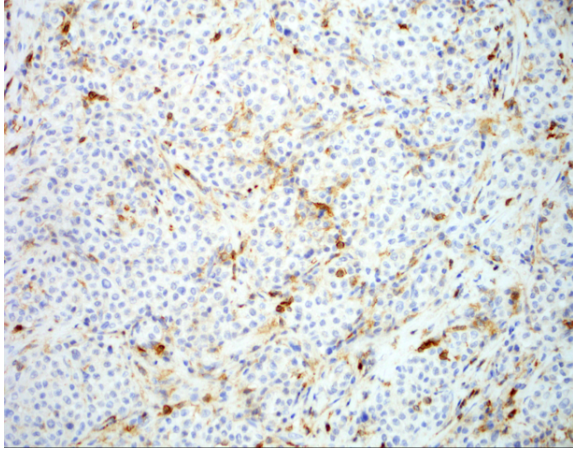

**CD8**

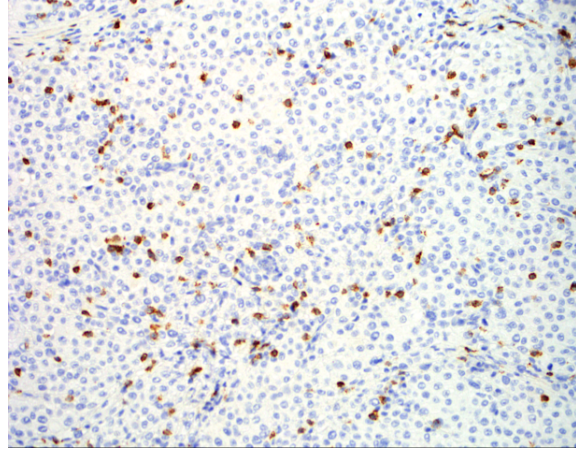

**Supplementary Figure 1:** Immunohistochemical analysis of tumor-infiltrating CD4 and CD8 T cells in mildly-infiltrated (non-hotspot) site of the liver metastasis.

**a**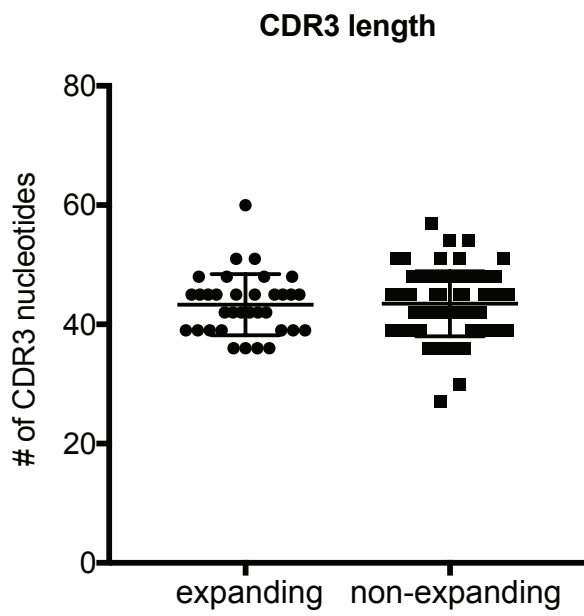**b**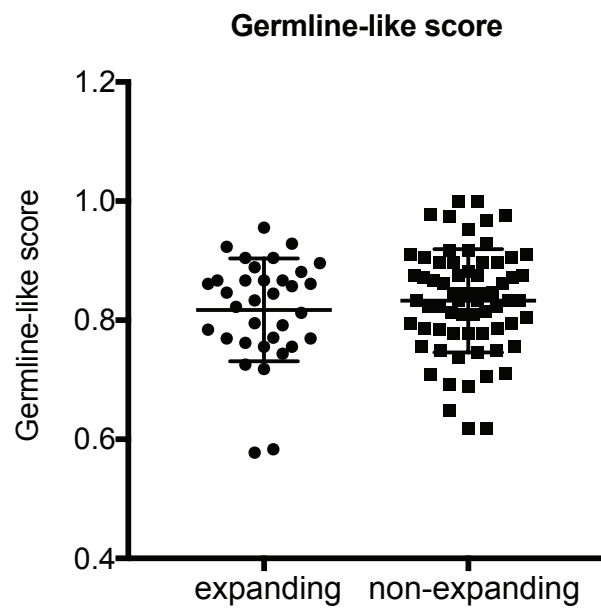

**Supplementary Figure 2:** TCR CDR3 sequence analysis of tumor-infiltrating peripheral blood CD8 T cell clones with a blood/tumor ratio of less than 3. **(a)** CDR3 length and **(b)** germline-like score of expanding and non-expanding T cell clones.

**a**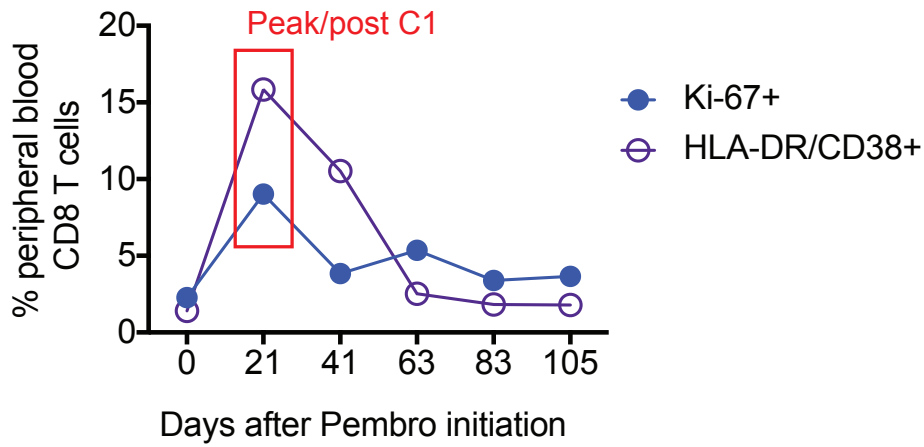**b**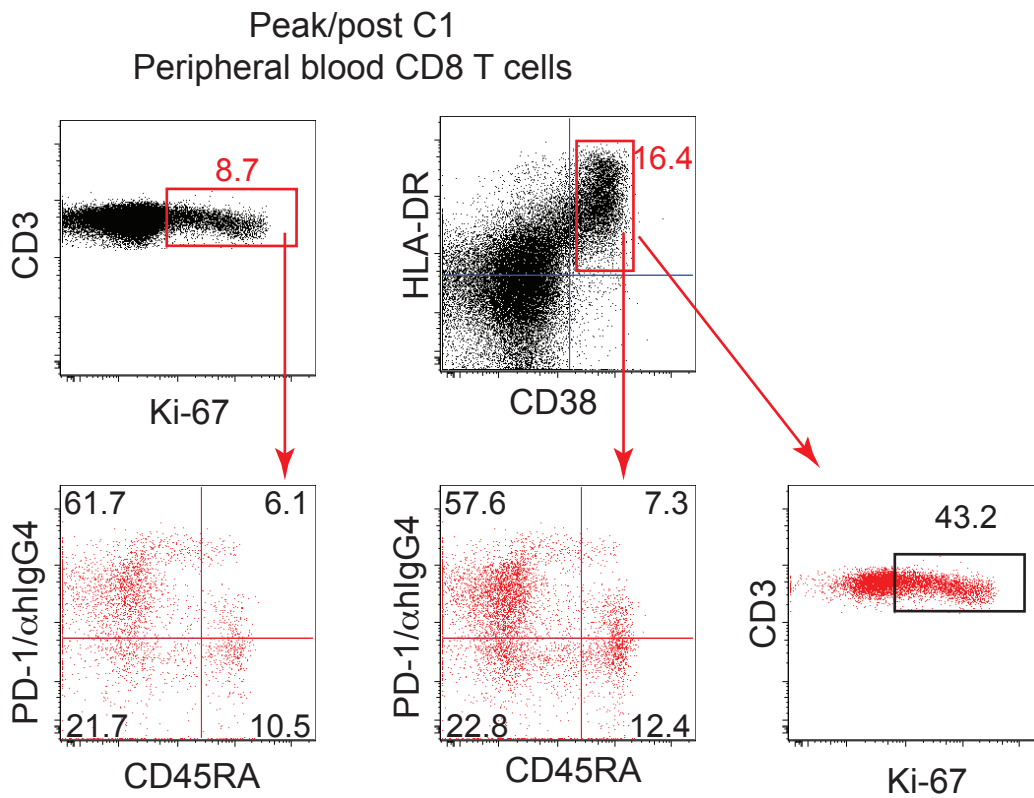

**Supplementary Figure 3:** Analysis of activated and proliferating CD8 T cells in peripheral blood. **(a)** Frequency of activated HLA-DR/CD38+ and proliferating Ki-67+ CD8 T cells during the course of treatment. **(b)** CD45RA and PD-1 expression on Ki-67+ and HLA-DR/CD38+ CD8 T cells 21 days post treatment initiation (post cycle 1).
